# Supplementary material for: Natural Deep Eutectic Solvent Extraction of Bioactive Pigments from Spirulina platensis and Electrospinning Ability Assessment
Source: MDPI journal article supplement (doi:10.3390/polym15061574), 2023-03-22
Supplement: s1 [file s1]

Supplementary material

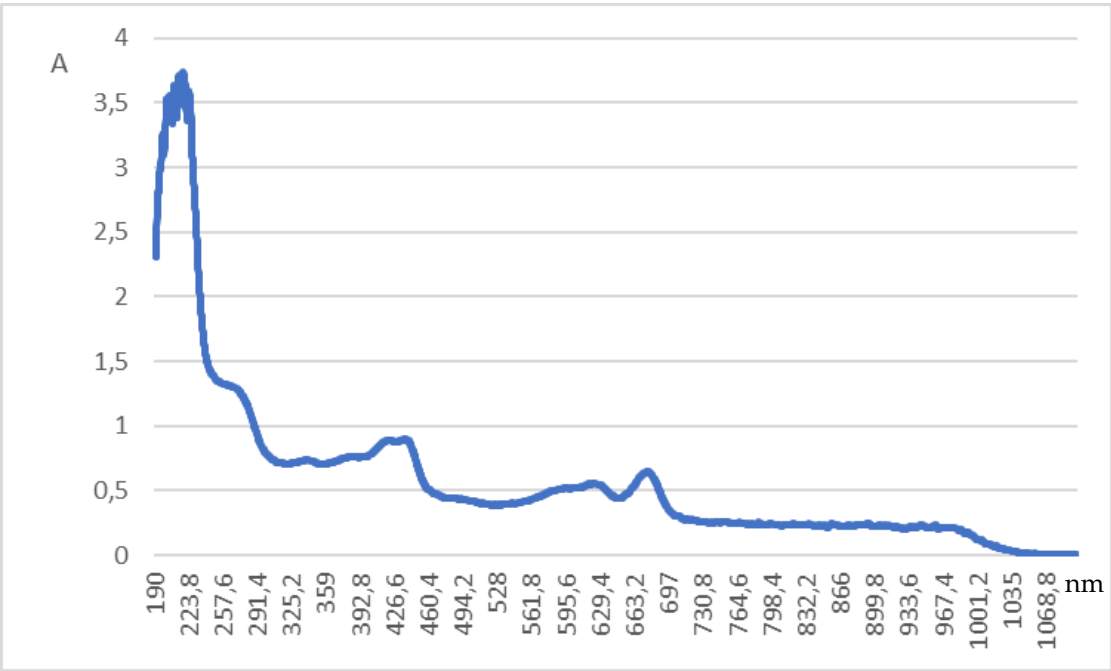

**Figure S1** – UV spectrum for the extracts obtained in the NADES/Sp UAE extraction.

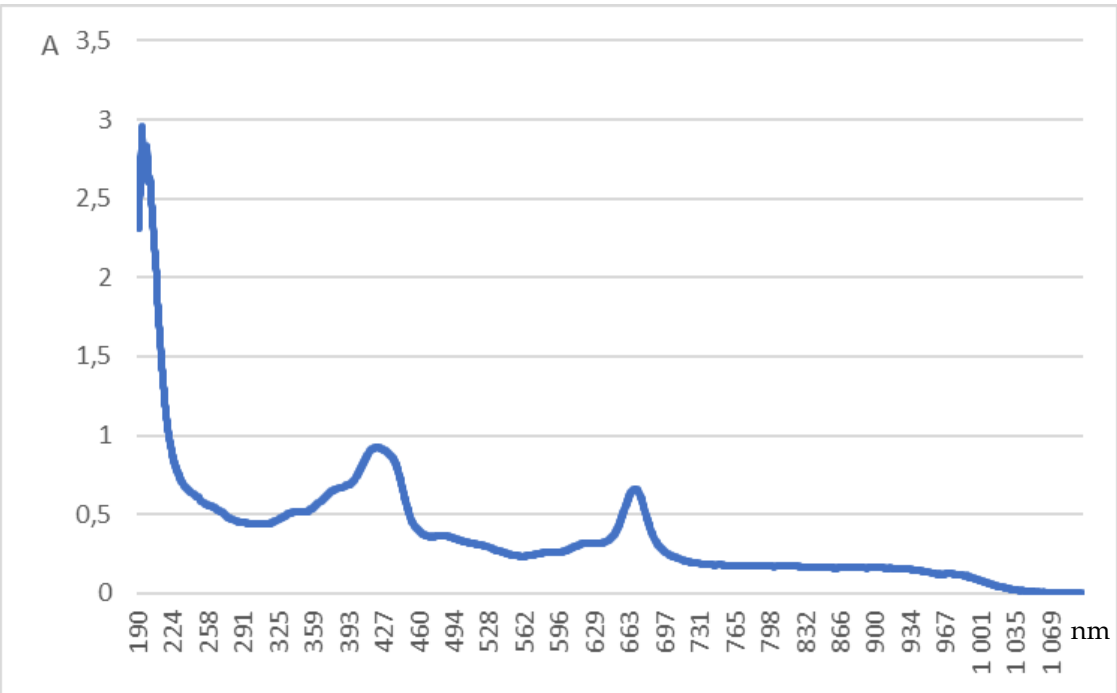

**Figure S2** – UV spectrum for the extracts obtained in the W/Sp UAE extraction.
